# Supplementary material for: In situ formation of nitrogen-doped carbon nanoparticles on hollow carbon spheres as efficient oxygen reduction electrocatalysts
Source: Royal Society of Chemistry journal article supplement (doi:10.1039/c6nr06716f), 2016-01-01
Supplement: c6nr06716f1.pdf [file c6nr06716f1.pdf]

## Electronic Supplementary Information:

### **In-situ formation of nitrogen-doped carbon nanoparticles on hollow carbon spheres as an efficient metal-free electrocatalyst towards the oxygen reduction reaction**

Tingsheng Zhou,<sup>ab</sup> Yao Zhou,<sup>b</sup> Ruguang Ma,<sup>b</sup> Zhenzhen Zhou,<sup>b</sup> Guanghui Liu,<sup>b</sup> Qian Liu,<sup>bc\*</sup> Yufang Zhu,<sup>a\*</sup> and Jiacheng Wang<sup>bc\*</sup>

<sup>a</sup> School of Materials Science and Engineering, University of Shanghai for Science and Technology, 516 Jungong Road, Shanghai 200093, P. R. China. Email: yfzhu@usst.edu.cn

<sup>b</sup> State Key Laboratory of High Performance Ceramics and Superfine Microstructure, Shanghai Institute of Ceramics, Chinese Academy of Sciences, 1295 Dingxi Road, Shanghai 200050, P. R. China. Email: jiacheng.wang@mail.sic.ac.cn; qianliu@sunm.shcnc.ac.cn

<sup>c</sup>Shanghai Institute of Materials Genome, Shanghai, P. R. China.

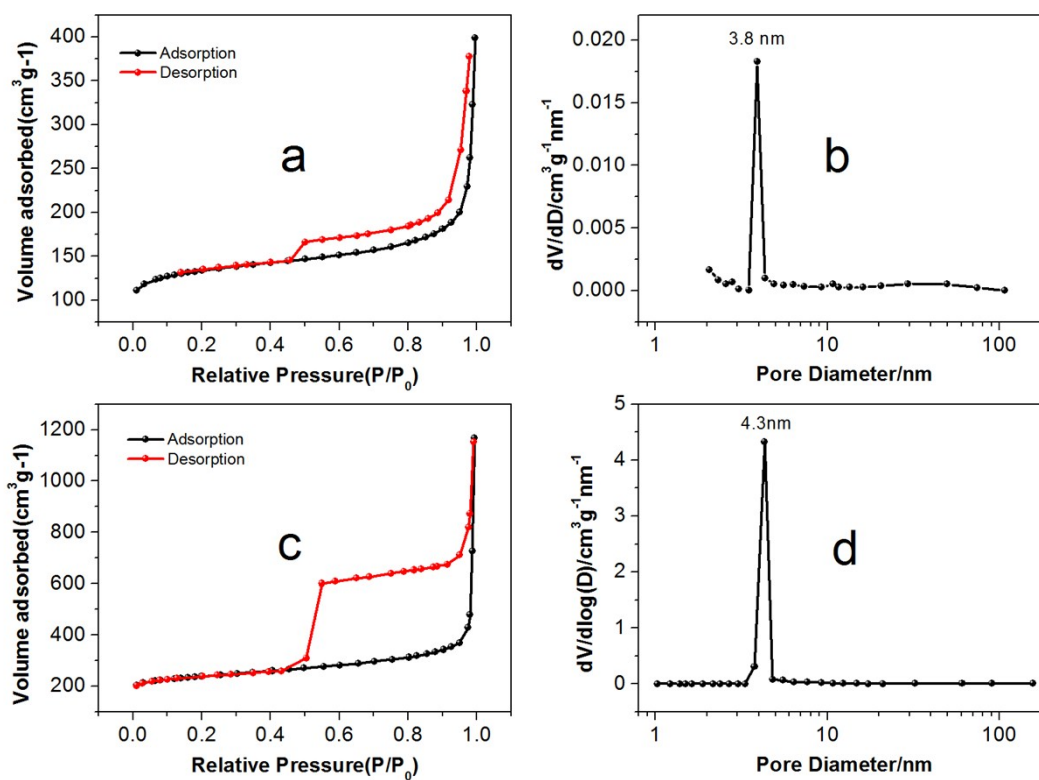

**Fig. S1** N<sub>2</sub> adsorption–desorption isotherm loop of (a) HPSs and (c) HCSs; BJH desorption pore size distribution of (b) HPSs and (d) HCSs.

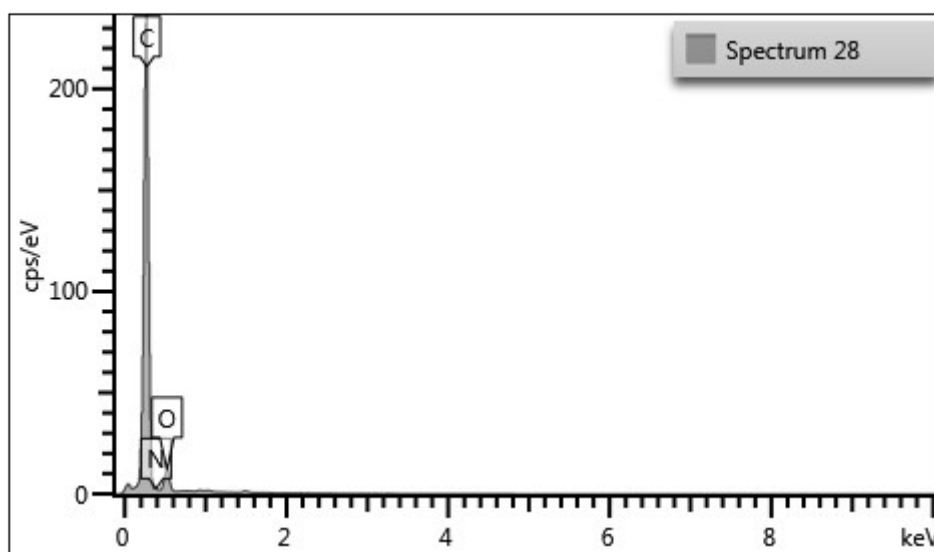

**Fig. S2** EDX spectra of NHCS-2.

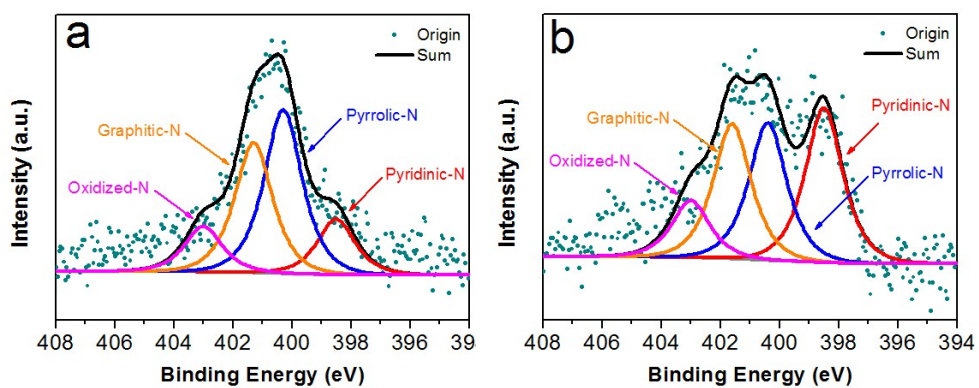

**Fig. S3** High-resolution XPS spectra of the NHCS-1 and NHCS-3.

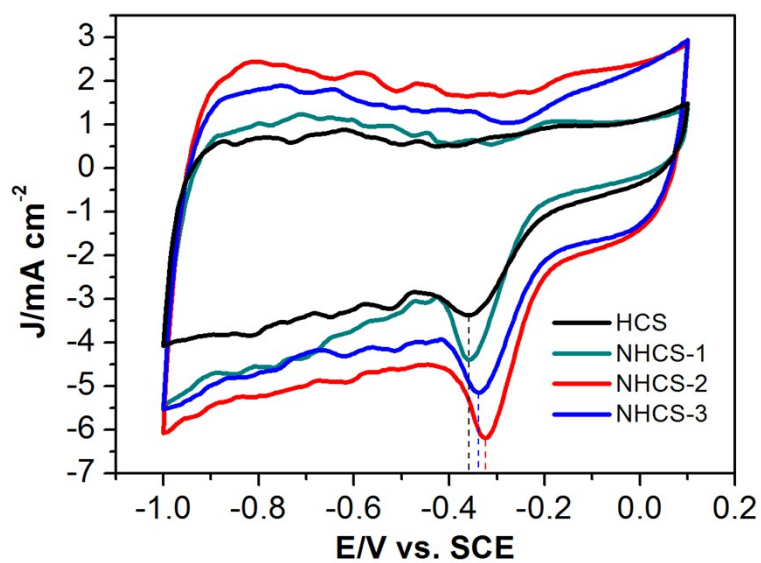

**Fig. S4** Comparison of CV curves of the HCS, NHCS-1, NHCS-2 and NHCS-3 with scanning rates of  $50 \text{ mV s}^{-1}$  in  $\text{O}_2$ -statured  $0.1 \text{ M KOH}$  solution.

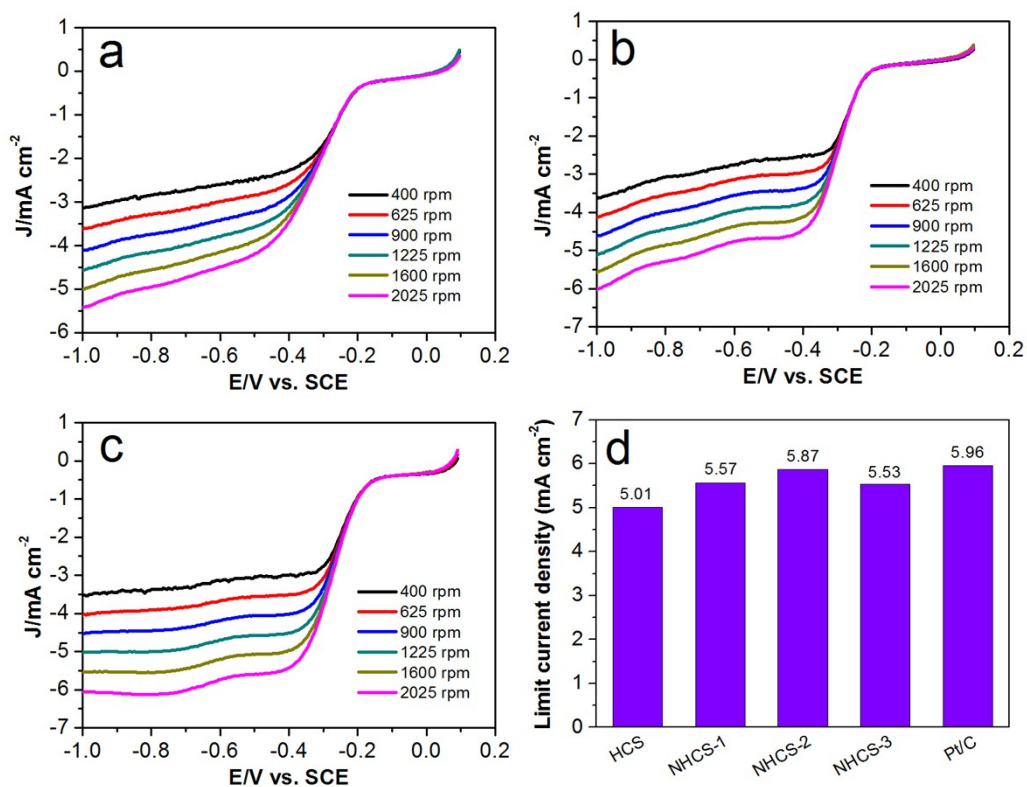

**Fig. S5** LSV curves of the (a) HCSs, (b) NHCS-1 and (c) NHCS-3 in  $\text{O}_2$ -saturated 0.1 M KOH solution at a different rotation rate from 400 to 2025 rpm; (d) Limit current density of the samples and commercial 20% Pt/C in  $\text{O}_2$ -saturated 0.1 M KOH solution at a rotation rate of 1600 rpm.
